# Supplementary material
Source: Springer Nature journal article supplement (https://www.springermedizin.de/resource/supplementary/12874_2008_355_MOESM1_ESM.pdf/9434298)
Supplement: MOESM1 [file 9434298]

**Table 4: Design effects calculations for hypothetical studies with different group distributions among centers.**

4.a. Balanced designs ( $n_1 = n_2$ ) with  $N = 200$  subjects and  $Q = 10$  centers of equal size (case of randomized trials with two treatment arms).

| Group distribution        | Homogeneous |          | Slightly heterogeneous |          | $S^* = 1$ |          | Heterogeneous |          | Strongly heterogeneous |          | Cluster design |          |
|---------------------------|-------------|----------|------------------------|----------|-----------|----------|---------------|----------|------------------------|----------|----------------|----------|
|                           | $m_{1j}$    | $m_{2j}$ | $m_{1j}$               | $m_{2j}$ | $m_{1j}$  | $m_{2j}$ | $m_{1j}$      | $m_{2j}$ | $m_{1j}$               | $m_{2j}$ | $m_{1j}$       | $m_{2j}$ |
| Group sizes per center    |             |          |                        |          |           |          |               |          |                        |          |                |          |
| Center 1                  | 10          | 10       | 8                      | 12       | 6         | 14       | 14            | 6        | 17                     | 3        | 20             | 0        |
| Center 2                  | 10          | 10       | 11                     | 9        | 12        | 8        | 8             | 12       | 6                      | 14       | 0              | 20       |
| Center 3                  | 10          | 10       | 10                     | 10       | 10        | 10       | 11            | 9        | 12                     | 8        | 20             | 0        |
| Center 4                  | 10          | 10       | 11                     | 9        | 11        | 9        | 6             | 14       | 4                      | 16       | 0              | 20       |
| Center 5                  | 10          | 10       | 9                      | 11       | 9         | 11       | 12            | 8        | 16                     | 4        | 20             | 0        |
| Center 6                  | 10          | 10       | 11                     | 9        | 13        | 7        | 5             | 15       | 3                      | 17       | 0              | 20       |
| Center 7                  | 10          | 10       | 10                     | 10       | 9         | 11       | 15            | 5        | 14                     | 6        | 20             | 0        |
| Center 8                  | 10          | 10       | 10                     | 10       | 10        | 10       | 7             | 13       | 2                      | 18       | 0              | 20       |
| Center 9                  | 10          | 10       | 8                      | 12       | 7         | 13       | 12            | 8        | 19                     | 1        | 20             | 0        |
| Center 10                 | 10          | 10       | 12                     | 8        | 13        | 7        | 10            | 10       | 7                      | 13       | 0              | 20       |
| $S^*$                     | 0           |          | 0.32                   |          | 1         |          | 2.08          |          | 7.20                   |          | 20             |          |
| $\frac{n_1 n_2}{NQ} S^*$  | 0           |          | 1.6                    |          | 5         |          | 10.4          |          | 36                     |          | 100            |          |
| $Deff^{**} (\rho = 0.01)$ | 0.990       |          | 0.993                  |          | 1.000     |          | 1.011         |          | 1.062                  |          | 1.190          |          |
| $Deff^{**} (\rho = 0.1)$  | 0.900       |          | 0.932                  |          | 1.000     |          | 1.108         |          | 1.620                  |          | 2.900          |          |

$m_{ij}$ : size of group  $i$  in center  $j$ .  $S^* = \frac{N}{n_1 n_2} \sum_{j=1}^Q \left( m_{1j} - \frac{m_j n_1}{N} \right)^2$ .  $Deff^{**}$ : Design effect.

4.b. Imbalanced designs ( $n_1 = 140$ ,  $n_2 = 60$ ) with  $N = 200$  subjects and  $Q = 10$  centers of equal size (case of observational studies with a binary risk factor).

| Group distribution       | Homogeneous |          | Slightly heterogeneous |          | $S^* = 1$ |          | Heterogeneous |          | Strongly heterogeneous |          |
|--------------------------|-------------|----------|------------------------|----------|-----------|----------|---------------|----------|------------------------|----------|
|                          | $m_{1j}$    | $m_{2j}$ | $m_{1j}$               | $m_{2j}$ | $m_{1j}$  | $m_{2j}$ | $m_{1j}$      | $m_{2j}$ | $m_{1j}$               | $m_{2j}$ |
| Group sizes per center   |             |          |                        |          |           |          |               |          |                        |          |
| Center 1                 | 14          | 6        | 15                     | 5        | 14        | 6        | 18            | 2        | 20                     | 0        |
| Center 2                 | 14          | 6        | 13                     | 7        | 12        | 8        | 9             | 11       | 20                     | 0        |
| Center 3                 | 14          | 6        | 14                     | 6        | 16        | 4        | 13            | 7        | 8                      | 12       |
| Center 4                 | 14          | 6        | 15                     | 5        | 12        | 8        | 16            | 4        | 8                      | 12       |
| Center 5                 | 14          | 6        | 16                     | 4        | 17        | 3        | 12            | 8        | 20                     | 0        |
| Center 6                 | 14          | 6        | 13                     | 7        | 11        | 9        | 11            | 9        | 20                     | 0        |
| Center 7                 | 14          | 6        | 12                     | 8        | 16        | 4        | 16            | 4        | 20                     | 0        |
| Center 8                 | 14          | 6        | 14                     | 6        | 12        | 8        | 10            | 10       | 8                      | 12       |
| Center 9                 | 14          | 6        | 15                     | 5        | 14        | 6        | 17            | 3        | 8                      | 12       |
| Center 10                | 14          | 6        | 13                     | 7        | 16        | 4        | 18            | 2        | 8                      | 12       |
| $S^*$                    | 0           |          | 0.33                   |          | 1         |          | 2.48          |          | 8.57                   |          |
| $\frac{n_1 n_2}{NQ} S^*$ | 0           |          | 1.4                    |          | 4.2       |          | 10.4          |          | 36                     |          |
| $Deff^{**}(\rho = 0.01)$ | 0.990       |          | 0.993                  |          | 1.000     |          | 1.015         |          | 1.076                  |          |
| $Deff^{**}(\rho = 0.1)$  | 0.900       |          | 0.933                  |          | 1.000     |          | 1.148         |          | 1.757                  |          |

$m_{ij}$  : size of group  $i$  in center  $j$ .  $S^* = \frac{N}{n_1 n_2} \sum_{j=1}^Q \left( m_{1j} - \frac{m_j n_1}{N} \right)^2$ .  $Deff^{**}$  Design effect.
